# Supplementary material
Source: PubMed Central journal article supplement (PMC10580387)
Supplement: pt3c00050_si_001.pdf [file pt3c00050_si_001.pdf]

# **Cell-dependent activation of ProTide prodrugs and its implications in antiviral studies**

Yueting Liu, Shuxin Sun, Jiapeng Li, Weiwen Wang, Hao-Jie Zhu \*

Department of Clinical Pharmacy, University of Michigan College of Pharmacy, 428 Church Street, Ann Arbor, Michigan 48109, United States

\*Corresponding author: Hao-Jie Zhu,

Department of Clinical Pharmacy, University of Michigan College of Pharmacy, 428 Church Street, Room 4565 NUB, Ann Arbor, Michigan 48109, United States

Email: [hjzhu@med.umich.edu](mailto:hjzhu@med.umich.edu)

## **Cytotoxicity assay**

We seeded cells at a density of 15,000 cells/well in a white-wall clear-bottom 96-well plate (Corning) and incubated the cells at 37°C in a CO<sub>2</sub> cell culture incubator. When cells reached 70-80% confluence, we added a serial of concentrations (0, 1, 5, 10, 25, 30 µM) of TAF or SOF in the culture medium to each well and incubated the cells for 24 hours at 37°C. Cytotoxicity was determined using the MTS Assay Kit (ab197010) according to the manufacturer's instruction. No cytotoxicity was observed for both compounds at the tested concentrations.

## **Mass spectrometer parameters of the LC-MS/MS assay**

The following MS parameters were adopted for all compounds: nebulizer gas: 15 psi; curtain gas: 15 psi; collision gas: 6 psi; ion spray voltage: 5500 V; source temperature: 550°C. Other compound-specific MS parameters, including M/Z transitions, delustering potential (DP), focusing potential (FP), entrance potential (EP), collision energy (CE), and collision cell exit potential (CXP), were summarized in Table S1.

**Table S1.** Mass spectrometer parameters for TAF, TFV, TFV-DP, SOF, SOF-MP, SOF-TP, and the internal standards 2-chloroadenosine and adenosine-<sup>15</sup>N5 5'-triphosphate

| Compound                                    | MRM ( <i>m/z</i> ) | DP(eV) | FP(eV) | EP(eV) | CE(eV) | CXP (eV) |
|---------------------------------------------|--------------------|--------|--------|--------|--------|----------|
| TAF                                         | 477.2→176.1        | 30     | 40     | 10     | 50     | 15       |
| TFV                                         | 288.1→176.1        | 15     | 28     | 6      | 30     | 15       |
| TFV-DP                                      | 448.0→270.1        | 15     | 29     | 6      | 26     | 15       |
| SOF                                         | 530.3→243.0        | 14     | 30     | 6      | 35     | 15       |
| SOF-MP                                      | 341.3→243.0        | 20     | 28     | 5      | 22     | 6        |
| SOF-TP                                      | 501.2→243.1        | 17     | 24     | 7      | 34     | 15       |
| 2-Chloroadenosine                           | 302.3→170.1        | 15     | 20     | 6      | 30     | 15       |
| Adenosine- <sup>15</sup> N5 5'-triphosphate | 513.0→141.0        | 15     | 30     | 6      | 30     | 15       |
